# Supplementary material for: A phase 2 open-label study of the safety and efficacy of weekly dosing of ATL1102 in patients with non-ambulatory Duchenne muscular dystrophy and pharmacology in mdx mice
Source: PubMed Central journal article supplement (PMC10810432; doi:10.1371/journal.pone.0294847), 2024-01-25
Supplement: pone.0294847.s012.pdf [file pone.0294847.s012.pdf]

## STATISTICAL ANALYSIS PLAN

### (Part 2)

**PROTOCOL NUMBER:** 1102-DMD-CT02

**TITLE:** A Phase 2 open label study to determine the safety, efficacy and pharmacokinetic profile of weekly dosing of ATL1102 in patients with non-ambulatory Duchenne Muscular Dystrophy (DMD).

**STUDY DRUG:** ATL1102 (CD49d antisense oligonucleotide)

**AUTHOR:** Peter Button  
Project Statistician  
McCloud Consulting Group  
13/23 Narabang Way  
Belrose NSW 2095  
Australia

**SPONSOR:** Antisense Therapeutics Limited  
6 Wallace Avenue  
Toorak Victoria 3142  
Australia

**DATE DRAFT:** 30<sup>th</sup> March 2020

**DOCUMENT VERSION:** Final V1.0

**SIGNATURES**

**STATISTICAL ANALYSIS PLAN (Part 2 V1.0)**

**TITLE:** A Phase 2 open label study to determine the safety, efficacy and pharmacokinetic profile of weekly dosing of ATL1102 in patients with non-ambulatory Duchenne Muscular Dystrophy (DMD).

**AUTHORS: MCG PERSONNEL:**

| <b>NAME (TITLE):</b>                       | <b>DATE</b>          | <b>SIGNATURE</b>                                                                    |
|--------------------------------------------|----------------------|-------------------------------------------------------------------------------------|
| Peter Button<br>(MCG Project Statistician) | <u>31 March 2020</u> | 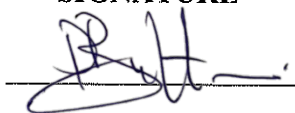 |

**REVIEWERS: MCG and SPONSOR PERSONNEL:**

| <b>NAME (TITLE):</b>                                        | <b>DATE</b>        | <b>SIGNATURE</b>                                                                      |
|-------------------------------------------------------------|--------------------|---------------------------------------------------------------------------------------|
| Philip McCloud<br>(MCG Director and Principal Statistician) | <u>31 MAR 2020</u> | 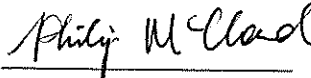 |

| <b>NAME (TITLE):</b>                                                                                                   | <b>DATE</b>          | <b>SIGNATURE</b>                                                                      |
|------------------------------------------------------------------------------------------------------------------------|----------------------|---------------------------------------------------------------------------------------|
| Nuket Desem<br>(Sponsor Representative)<br>Director, Clinical and Regulatory Affairs<br>Antisense Therapeutics Limited | <u>31 March 2020</u> | 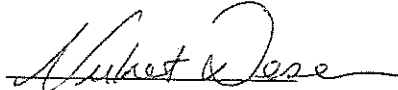 |

## VERSION HISTORY

| <b>Document</b>   | <b>Summary of Change</b>                                                                                                                                                                        | <b>Date of Issue</b>           |
|-------------------|-------------------------------------------------------------------------------------------------------------------------------------------------------------------------------------------------|--------------------------------|
| Draft Version 0.1 |                                                                                                                                                                                                 | 15 <sup>th</sup> October 2018  |
| Draft Version 0.2 | Update VAD Specs                                                                                                                                                                                | 29 <sup>th</sup> October 2019  |
| Draft Version 0.3 | Include Output Templates in separate document                                                                                                                                                   | 24 <sup>th</sup> November 2019 |
| Draft Version 0.4 | Update to include MRI data Tables and Listings                                                                                                                                                  | 19 <sup>th</sup> February 2020 |
| Draft Version 0.5 | Update to include output templates for PedsQL Parent and Teens data                                                                                                                             | 20 <sup>th</sup> February 2020 |
| Draft Version 0.6 | Include Section 6.4.2. to specify convention for handling repeat assessment data, and update Section 10.2 to specify which efficacy analyses will be repeated with the Per-Protocol population. | 27 <sup>th</sup> February 2020 |
| Final V1.0        | Consistent with Part 1 V1.0 date                                                                                                                                                                | 30 <sup>th</sup> March 2020    |

## LIST OF ABBREVIATIONS

| <b>Abbreviation</b> | <b>Definition</b>                                        |
|---------------------|----------------------------------------------------------|
| 6MWT                | 6-minute walk test                                       |
| AE                  | Adverse Event                                            |
| ADA                 | Anti-drug antibodies                                     |
| ADME                | Absorption, distribution, metabolism and excretion       |
| A/G                 | Albumin/globulin                                         |
| ALP                 | Alkaline phosphatase                                     |
| ALT                 | Alanine aminotransferase                                 |
| ANA                 | Anti-nuclear antibodies                                  |
| ANCA                | anti-neutrophil cytoplasmic antibodies                   |
| APTT                | Activated Partial Prothrombin Time                       |
| ASO                 | Antisense Oligonucleotide                                |
| AST                 | Aspartate aminotransferase                               |
| ATL                 | Antisense Therapeutics Limited                           |
| AUC                 | Area under (concentration-time) curve to last time-point |
| AUC <sub>inf</sub>  | Area under (concentration-time) curve to infinity        |
| CIC                 | circulating immune complexes                             |
| CK                  | Creatinine kinase                                        |
| C <sub>max</sub>    | Maximum observed plasma concentration                    |
| C <sub>min</sub>    | Minimum observed plasma concentration                    |
| CRA                 | Clinical Research Associate                              |
| CRF                 | Case Report Form                                         |
| CPF                 | Cough peak flow                                          |
| CRP                 | C-reactive protein                                       |
| DNA                 | Deoxyribonucleic acid                                    |
| DMD                 | Duchenne Muscular Dystrophy                              |
| DSMB                | Data Safety Monitoring Board                             |
| ECG                 | Electrocardiogram                                        |
| EK                  | Egen Klassifikation                                      |
| FEV1                | Forced expiratory volume in 1 second                     |

|        |                                              |
|--------|----------------------------------------------|
| FVC    | Forced vital capacity                        |
| GCP    | Good Clinical Practice                       |
| G-CSF  | granulocyte colony stimulating factor        |
| GGT    | Gamma glutamyl transferase                   |
| IB     | Investigator's Brochure                      |
| ICH    | International Council for Harmonisation      |
| ID     | Identification                               |
| IEC    | Independent Ethics Committee                 |
| IgM    | Immunoglobulin M                             |
| INR    | International Normalised Ratio               |
| IP     | Investigational product                      |
| ITT    | Intent-to-Treat                              |
| IUD    | Intra-uterine device                         |
| IV     | Intravenous                                  |
| LDH    | Lactate dehydrogenase                        |
| LOAEL  | Low observed adverse effect level            |
| MCP1   | Monocyte chemotactic protein-1               |
| MedDRA | Medical Dictionary for Regulatory Activities |
| MEP    | Maximum expiratory pressure                  |
| MIP    | Maximum inspiratory pressure                 |
| MRI    | Magnetic Resonance Imaging                   |
| mRNA   | Messenger Ribonucleic Acid                   |
| MS     | Multiple Sclerosis                           |
| NOAEL  | No observed adverse effect level             |
| PD     | Pharmacodynamic                              |
| PedsQL | Pediatric quality-of-life instrument         |
| PEF    | Peak expiratory flow                         |
| PICF   | Patient Information and Consent Form         |
| PK     | Pharmacokinetic                              |
| PP     | Per Protocol                                 |
| PT     | Preferred Term                               |
| PUL    | Performance of the Upper Limb                |

|                  |                                        |
|------------------|----------------------------------------|
| RBC              | Red blood cell                         |
| RNA              | Ribonucleic acid                       |
| RRMS             | Relapsing remitting multiple sclerosis |
| SAE              | Serious Adverse Event                  |
| SAP              | Statistical Analysis Plan              |
| SC               | subcutaneous                           |
| SNIP             | Sniff nasal inspiratory pressure       |
| SOC              | System Organ Class                     |
| STIR             | Short Tau Inversion Recovery           |
| T <sub>1/2</sub> | Terminal elimination half-life         |
| TEAE             | Treatment emergent adverse event       |
| T <sub>max</sub> | Time to maximal concentration          |
| ULN              | Upper Limit of Normal                  |
| VLA-4            | Very Late Antigen 4                    |
| WBC              | White blood cell                       |

## CONTENTS

|                                              |    |
|----------------------------------------------|----|
| Version History .....                        | 3  |
| List of Abbreviations .....                  | 4  |
| Contents .....                               | 7  |
| 1. INTRODUCTION .....                        | 8  |
| 2. StANDARD HEADER AND FOOTER .....          | 8  |
| 3. PROGRAMMING NOTES .....                   | 8  |
| 4. Value added datasets specifications ..... | 9  |
| 5. References .....                          | 11 |
| 6. List of outputs .....                     | 11 |
| 7. Output Templates .....                    | 15 |

## 1. INTRODUCTION

This document describes the data displays to be produced planned statistical analyses for the safety, efficacy and pharmacokinetic endpoints for the Protocol 1102-DMD-CT02. This includes underlying populations and templates. The templates will provide an overview and guidance of available information and layout schemes, but do not necessarily need to be an exact match with outputs produced.

This SAP supplements the study Protocol 1102-DMD-CT02 Final Version 6.0 dated 20<sup>th</sup> September 2019. If the protocol is amended, this SAP will be revised as required. The plan will be finalized before the study database is locked.

## 2. STANDARD HEADER AND FOOTER

The following standard header and footer will be included on all tables and listings:

### **Header**

<Table, Listing and Figure Title>

**Antisense Therapeutics Limited**

**Protocol: 1102-DMD-CT02**

<Subtitle, if needed>

Population: < >

### **Footer**

Program: < filename of the program> Report: < filename of the report> Run Date: <Date of production DDMMYYYY>

Footnote requirements to explain specifics for the output

## 3. PROGRAMMING NOTES

Notes for programmers' will be stated as "Notes" below the table templates or written directly within a table as annotations. Notes for programming should not necessarily appear in any outputs.



## 4. VALUE ADDED DATASETS SPECIFICATIONS

### Laboratory Data VAD

Laboratory Ranges dataset [has Age specific normal ranges – need Age from Demo]

Notes:

- Set lower/upper limits for CRP to 0, 7.99
- If value (lborresc) is <5 set value to 4.99
- If value (lborresc) is <10 set value to 9.99
- Determine AG Ratio as  $AG\_Ratio = (albumin / (total\_protein - albumin))$ ;
- Determine H, L flags after merging ranges

### FACS Tube VADs

Approach used to determine FACS parameters:

Using the lymphocyte counts from the Haematology lab results (FBC) calculate the cell numbers (as  $10^9/L$ ) utilising the cell subset percentages determined by the FACS analysis as these cell subset percentages will be accurate. This applies to the T lymphocytes (CD3+) and the subsets of T lymphocytes (CD4+, CD8+), B lymphocytes (CD19+), the NK Cells and the Th1, Th2 and Th17 cells. The same is also applicable for the Monocytes. where the monocyte counts from the FBC can be used to calculate the cell numbers for the cell subsets including the M1 cell subsets based on the cell subset percentages determined by the FACS analysis.

### MYOSET Data VAD

Include Grip, Pinch and Moviplate Total Scores – and for each Score the Dominant/Non-Dominant Side and the Right/Left Hand Side

And need to determine Percent Predicted Values for Grip and Pinch Scores:

For Average (Left and Right Hand), Right Hand and Left Hand

Percent Predicted Pinch

If Age < 17 then

- Percent Predicted =  $(Pinch\ Score \times 100) / (1.956 \times (Exp(0.088 \times Age)))$
- Percent Predicted =  $(Grip\ Score \times 100) / (3.3996 \times (Exp(0.1527 \times Age)))$

If Age  $\geq$  17 then

- Percent Predicted = (Pinch Score x 100)/(8.206 x (Exp(-0.001 x Age)))
- Percent Predicted =(Grip Score x 100)/(45.662 x (Exp(-0.001 x Age)))

Age should be based on patient's Age at a particular visit (so formula used for a patient may change during the study (if they Age < 17 to Age  $\geq$  17

### **PUL2.0 Measure VAD**

Three Dimension and one Total Score

High Level Shoulder Dimension Score: Sum responses to Items 1-6

Mid Level Elbow Dimension Score: Sum responses to Items 7-15

Distal Wrist & Hand Dimension Score: Sum responses to Items 16-22

Total Score: Sum responses to Items 1-22

### **PedsQL VAD for Teens and Parent**

Description of the Duchenne Muscular Dystrophy Module:

| Dimensions       | Number of Items | Cluster of Items | Reversed Scoring | Direction of Dimensions               |
|------------------|-----------------|------------------|------------------|---------------------------------------|
| Daily Activities | 5               | 1-5              | 1-5              | Higher scores indicate lower problems |
| Treatment        | 4               | 1-4              | 1-4              |                                       |
| Worry            | 6               | 1-6              | 1-6              |                                       |
| Communication    | 3               | 1-3              | 1-3              |                                       |

Scoring of Dimensions:

|                                |                                                          |
|--------------------------------|----------------------------------------------------------|
| Item Scaling                   | 5-point Likert scale from 0 (Never) to 4 (Almost always) |
| Weighting of Items             | No                                                       |
| Extension of the Scoring Scale | Scores are transformed on a scale from 0 to 100.         |

|                                             |                                                                                                                                                                                                                                                                                                                                                                                                                  |
|---------------------------------------------|------------------------------------------------------------------------------------------------------------------------------------------------------------------------------------------------------------------------------------------------------------------------------------------------------------------------------------------------------------------------------------------------------------------|
| Scoring Procedure                           | <p><b><u>Step 1: Transform Score</u></b></p> <p>Items are reversed scored and linearly transformed to a 0-100 scale as follows:</p> <p>0=100, 1=75, 2=50, 3=35, 4=0</p> <p><b><u>Step 2: Calculate Scores by Dimensions</u></b></p> <p>If more than 50% of the items in the scale are missing, the scale scores should not be computed</p> <p>Mean score= Sum of the items over the number of items answered</p> |
| Interpretation and Analysis of Missing Data | <p>No Total Score:</p> <p>If more than 50% of the items in the scale are missing, the Scale Scores should not be computed.</p> <p>If 50% or more items are completed: Impute the mean of the completed items in a scale.</p>                                                                                                                                                                                     |

## 5. REFERENCES

1. SAS/STAT Software. 9.4 ed. Cary, NC: SAS Institute

## 6. LIST OF OUTPUTS

### Listings

|                |                                                                  |
|----------------|------------------------------------------------------------------|
| Listing L1.1   | Subject Visit Days                                               |
| Listing L1.2   | Subject Demographics                                             |
| Listing L1.3   | Protocol Deviations                                              |
| Listing L1.4   | Subject Study Populations                                        |
| Listing L1.5   | Subject Comments                                                 |
| Listing L2.1.1 | Subject Duchenne Muscular Dystrophy History                      |
| Listing L2.1.2 | Subject Duchenne Muscular Dystrophy History - Durations          |
| Listing L2.2   | Subject Medical and Surgical History                             |
| Listing L3.1   | Subject Prior Duchenne Muscular Dystrophy Medication             |
| Listing L3.2   | Subject Prior Duchenne Muscular Dystrophy Medication - Durations |

|                   |                                                                                                          |
|-------------------|----------------------------------------------------------------------------------------------------------|
| Listing L4        | Subject Prior Non-DMD Medication                                                                         |
| Listing L5        | Subject Concomitant Medication                                                                           |
| Listing L6        | Subject Disposition Completion Withdrawal                                                                |
| Listing L7        | Subject Treatment Administration                                                                         |
| Listing L8        | Injection Site Tolerability                                                                              |
| Listing L9        | Vital Signs                                                                                              |
| Listing L10       | ECG                                                                                                      |
| Listing L11       | Adverse Events                                                                                           |
| Listing L12       | Serious Adverse Events                                                                                   |
| Listing L13.1.1-5 | Biochemistry                                                                                             |
| Listing L13.1.6   | Biochemistry                                                                                             |
| Listing L13.2.1-2 | Coagulation                                                                                              |
| Listing L13.2.3   | Coagulation                                                                                              |
| Listing L13.3.1-3 | Haematology                                                                                              |
| Listing L13.3.4   | Haematology                                                                                              |
| Listing L13.4.1-2 | Urinalysis                                                                                               |
| Listing L13.4.3   | Urinalysis                                                                                               |
| Listing 14.1      | Liver Chemistry Elevations Stopping Rule                                                                 |
| Listing 14.2      | Renal Function Test Result Stopping Rule                                                                 |
| Listing 14.3      | Platelet Count Result Stopping Rule and C-reactive Protein Stopping Rule                                 |
| Listing 14.4      | Albumin and A_G ratio Complement C3 Test Result Stopping Rule                                            |
| Listing L15.1     | FACS Tube 1 Data                                                                                         |
| Listing L15.2     | FACS Tube 2 Data                                                                                         |
| Listing L15.3     | FACS Tube 3 Data                                                                                         |
| Listing 16.1      | Listing of MRI Muscle Structure Fatty Infiltration (3 point Dixon)                                       |
| Listing 16.2      | Listing of MRI Muscle Oedema Score (by STIR)                                                             |
| Listing 16.3      | Listing of MRI Muscle Structure Atrophy (3 point Dixon)                                                  |
| Listing 16.4      | Listing of MRI Cross Sectional Muscle Area (mm <sup>2</sup> )                                            |
| Listing 16.5      | Listing of MRI Fat Fraction (%)                                                                          |
| Listing L17.1-3   | Respiratory Function Assessment (SNIP, PEF, PEF(%Pred), CPF, FVC, FVC(%Pred), FEV1, FEV1(%Pred) MIP, MEP |
| Listing L17.4     | Respiratory Function Assessment                                                                          |
|                   | <a href="#">[Listing 21 in output templates]</a>                                                         |
| Listing L18       | Egen Klassification Scale Version (EK2)                                                                  |
|                   | <a href="#">[Listing 22 in output templates]</a>                                                         |

Listing 19.1 MyoSet – MyoGrip  
 Listing 19.2 MyoSet – MyoPinch  
[\[Listing 23 in output templates\]](#)  
 Listing 19.3 MyoSet – MoviePlate

Listing L20.1.1 MyoSet - Combined Dominant  
 Listing L20.1.2 MyoSet - Combined Non-Dominant  
 Listing L20.2.1 MyoSet - Combined - Percent Predicted Average  
 Listing L20.2.2 MyoSet - Combined - Percent Predicted Dominant  
 Listing L20.2.3 MyoSet - Combined - Percent Predicted Non-Dominant  
[\[Listing 24 in output templates\]](#)

Listing L21 PedsQL Parent Report  
[\[Listing 25 in output templates\]](#)

Listing L22 PedsQL Teen Report  
[\[Listing 26 in output templates\]](#)

Listing L23 Functional Capacity Assessment – PUL 2.0 (PUL for DMD)  
 Performance of the Upper Limb Module (PUL) – Responses to  
 questions related to Dimensions for High Level Shoulder, Mid-Level  
 Elbow, Distal wrist and hand  
[\[Listing 27 in output templates\]](#)

Listing 24 Pharmacodynamic Assessment Immunogenicity  
 Listing 25 Pharmacodynamic Blood Sample

## **Figures**

Figure 1.1-1.4 PUL 2.0 (PUL for DMD)  
 Figure 2 - EK2  
 Figure 3 - PedsQL Parent  
 Figure 4 - PedsQL Teen  
 Figure 5 - Lymphocytes  
 Figure 5\_2 Eosinophils  
 Figure 6.1-6.6 MyoSet  
 Figure 6.7 MyoSet – Percent Predicted  
 Figure 7.1-7.11 FACS Tube 1  
 Figure 8.1-8.6 FACS Tube 2  
 Figure 9.1a/b-9.6a/b Respiratory  
 Figure 10.1-10.10 FACS Tube 1 – group means  
 Figure 10.2.1-10.2.10 FACS Tube 1 – change group means  
 Figure 11.1.1-11.1.6 FACS Tube 2 – group means

Figure 11.2.1-11.2.6 FACS Tube 2 – change group means

**Tables**

|                |                                                 |
|----------------|-------------------------------------------------|
| Table T1       | Demographics                                    |
| Table T2.1-4   | Vital Signs                                     |
| Table T2.5     | Vital Signs Assessment                          |
| Table T3.1     | Adverse Events                                  |
| Table T3.2     | Overall Summary of Adverse Events               |
| Table T4       | Treatment Exposure                              |
| Table T5.1     | Biochemistry                                    |
| Table T5.2     | Coagulation                                     |
| Table T5.3     | Haematology                                     |
| Table T6.1     | Biochemistry (Shift Tables)                     |
| Table T6.2     | Coagulation (Shift Tables)                      |
| Table T6.3     | Haematology (Shift Tables)                      |
| Table T7.1-7.4 | PUL2.0 Total Score (Overall and By Entry Score) |
| Table T8       | Egen Klassifikation Scale Version 2(EK2)        |
| Table T9       | Respiratory Measures                            |
| Table T10      | MYOSET Measures                                 |

|                   |                                               |
|-------------------|-----------------------------------------------|
| Table T11.1.1.1   | FACS Tube 1 Change (FAS)                      |
| Table T11.1.1.1.1 | FACS Tube 1 Change PValues (FAS)              |
| Table T11.1.1.1.2 | FACS Tube 1 Change PValues ExtraWk24_28 (FAS) |

|                   |                                                       |
|-------------------|-------------------------------------------------------|
| Table T11.1.1.2   | FACS Tube 1 Percent Change (FAS)                      |
| Table T11.1.1.2.1 | FACS Tube 1 Percent Change PValues (FAS)              |
| Table T11.1.1.2.2 | FACS Tube 1 Percent Change PValues ExtraWk24_28 (FAS) |

**Tables T11.1.1 Repeated for Per Protocol Population**

|                   |                                              |
|-------------------|----------------------------------------------|
| Table T11.1.2.1   | FACS Tube 1 Change (PP)                      |
| Table T11.1.2.1.1 | FACS Tube 1 Change PValues (PP)              |
| Table T11.1.2.1.2 | FACS Tube 1 Change PValues ExtraWk24_28 (PP) |

|                   |                                                      |
|-------------------|------------------------------------------------------|
| Table T11.1.2.2   | FACS Tube 1 Percent Change (PP)                      |
| Table T11.1.2.2.1 | FACS Tube 1 Percent Change PValues (PP)              |
| Table T11.1.2.2.2 | FACS Tube 1 Percent Change PValues ExtraWk24_28 (PP) |

|               |                            |
|---------------|----------------------------|
| Table T11.2.1 | FACS Tube 2 Change         |
| Table T11.2.2 | FACS Tube 2 Percent Change |
| Table T11.3.1 | FACS Tube 3 Change         |
| Table T11.3.2 | FACS Tube 3 Percent Change |

|                                                |                                                                                                                      |
|------------------------------------------------|----------------------------------------------------------------------------------------------------------------------|
| Table T12.1-5                                  | ECG Data                                                                                                             |
| Table T12.6                                    | ECG Data Assessment                                                                                                  |
| Table 13.1.1-3                                 | Summary of MRI Muscle Structure Fatty Infiltration (3 point Dixon) – Central Reading (and Distal, Proximal Readings) |
| Table 13.2.1-3                                 | Summary of MRI Muscle Oedema Score (by STIR) – Central Reading (and Distal, Proximal Readings)                       |
| Table 13.3.1-3                                 | Summary of MRI Muscle Structure Atrophy (3 point Dixon) – Central Reading (and Distal, Proximal Readings)            |
| Table 13.4.1-3                                 | Summary of MRI Cross Sectional Muscle Area (mm <sup>2</sup> ) – Central Reading (and Distal, Proximal Readings)      |
| Table 13.5.1-3                                 | Summary of MRI Fat Fraction (%) – Central Reading (and Distal, Proximal Readings)                                    |
| <a href="#">[Table 16 in output templates]</a> |                                                                                                                      |
| Table 14                                       | Summary of PedsQL Parent Report                                                                                      |
| Table 15                                       | Summary of PedsQL Teen Report                                                                                        |

## **7. OUTPUT TEMPLATES**

In Document SAP Part 2 V1.0 LTF Templates
